# Supplementary material for: A mathematical model clarifies the ABC Score formula used in enhancer-gene prediction
Source: PubMed Central journal article supplement — bioRxiv. 2024 Dec 3:2024.11.29.626072. Preprint. [Version 1] doi: 10.1101/2024.11.29.626072 (PMC11642778; doi:10.1101/2024.11.29.626072), 2024-12-03
Supplement: NIHPP2024.11.29.626072V1-supplement-1.pdf [file NIHPP2024.11.29.626072V1-supplement-1.pdf]

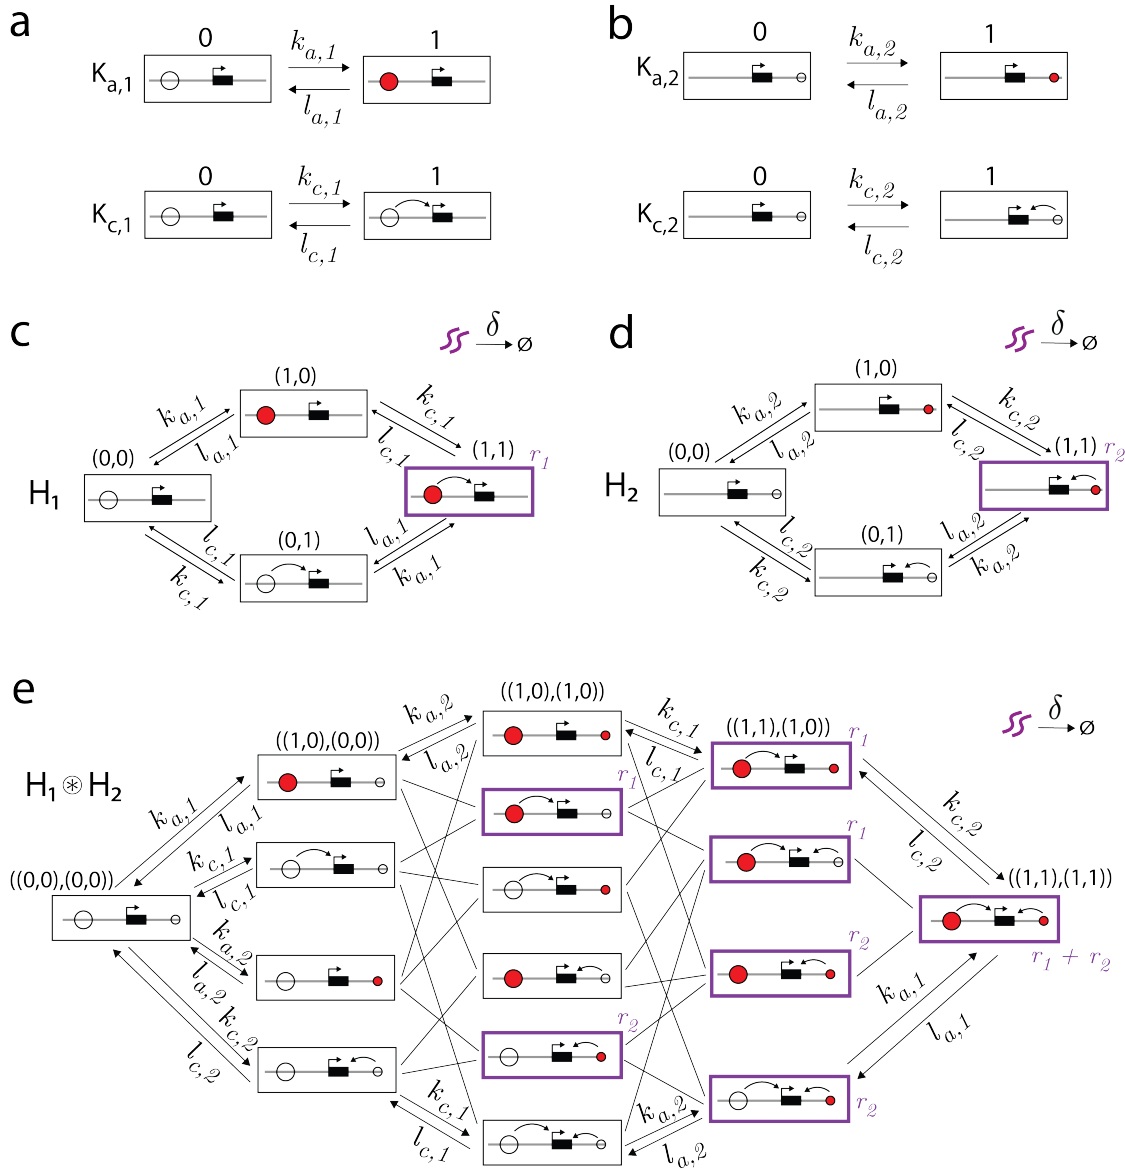

**Figure S1:** IAC model for  $N = 2$  enhancers as a product graph of product graphs. **(a)** Graphs describing the activation and communication status of enhancer 1. **(b)** Graphs describing the activation and communication status of enhancer 2. **(c)** The graph  $H_1$  whose underlying regulatory graph is  $K_{a,1} \otimes K_{c,1}$ . **(d)** The graph  $H_2$  whose underlying regulatory graph is  $K_{a,2} \otimes K_{c,2}$ . **(e)** The graph  $H_1 \otimes H_2$  satisfying the default model Assumptions 1-4 with components  $H_1$  and  $H_2$ . The regulatory graph of  $H_1 \otimes H_2$  is given by  $(K_{a,1} \otimes K_{c,1}) \otimes (K_{a,2} \otimes K_{c,2})$ . Each vertex of this graph corresponds to the activation and communication statuses of both enhancers. For the vertices along the top of the graph, the product-graph binary notation is also provided using the coordinate system  $((a_1, c_1), (a_2, c_2))$ . Reverse edges and labels of most edges are omitted for clarity. Production states are highlighted in purple with corresponding production rates also in purple font.
